# Supplementary material for: A novel electrochemical aptasensor for sensitive detection of streptomycin based on gold nanoparticle-functionalized magnetic multi-walled carbon nanotubes and nanoporous PtTi alloy
Source: Royal Society of Chemistry journal article supplement (doi:10.1039/c6ra02029a), 2016-01-01
Supplement: c6ra02029a1.pdf [file c6ra02029a1.pdf]

Supplementary Material

**A novel electrochemical aptasensor for sensitive detection  
of streptomycin based on gold nanoparticles functionalized magnetic  
multi-walled carbon nanotubes and nanoporous PtTi alloy**

Yan Yin<sup>a</sup>, Xiaoli Qin<sup>b\*</sup>, Qianchao Wang<sup>a</sup> and Yin Yin<sup>c</sup>

*<sup>a</sup>School of Environmental Science and Engineering, Qilu University of Technology,  
Jinan 250353, China*

*<sup>b</sup>School of Chemistry and Chemical Engineering, University of Jinan, Shandong  
Provincial Key Laboratory of Chemical Sensing & Analysis, Jinan 250022, China.*

*<sup>c</sup>Capital Normal University, Zhongguancun High-tech Industry Promotion Center,  
Beijing 100080, China.*

\* Corresponding author. Tel: +86-15288874940;

E-mail: qinxiaoli\_123@163.com.

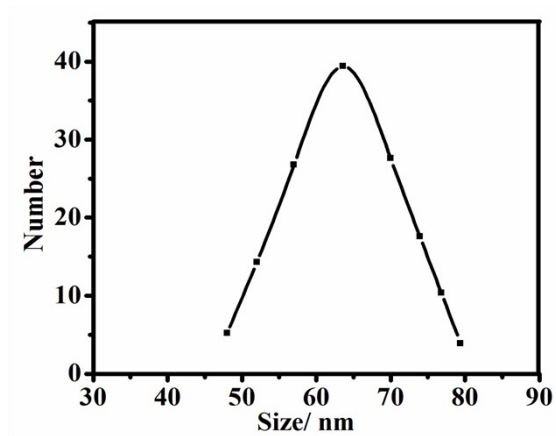

**Fig. S1** Grain size distribution of NP-PtTi alloy.

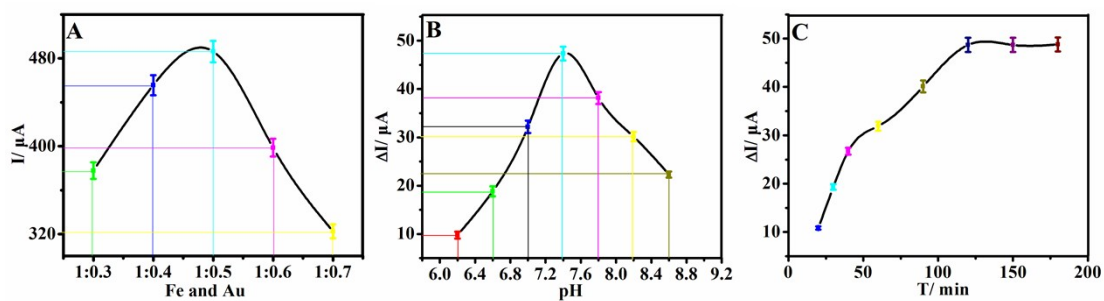

**Fig. S2** Effect of (A) the atomic percent ratio of Fe and Au on the CV peak current of the aptasensor, (B) the value of pH and (C) the incubation time of streptomycin on the DPV peak current of the aptasensor.

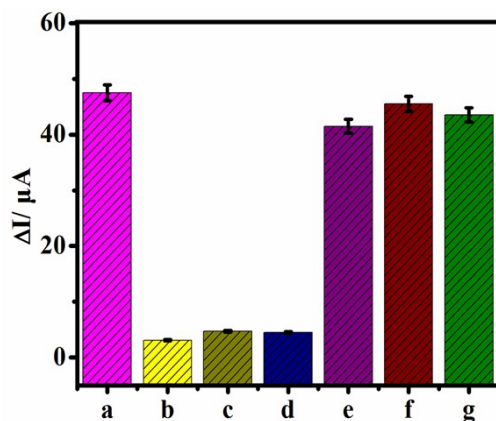

**Fig. S3** DPV current responses of the aptasensor using (a) 5  $\mu\text{mol L}^{-1}$  streptomycin aptamer, (b) 5  $\mu\text{mol L}^{-1}$  oxytetracycline aptamer, (c) 5  $\mu\text{mol L}^{-1}$  kanamycin aptamer, (d) 5  $\mu\text{mol L}^{-1}$  neomycin aptamer, (e) 5  $\mu\text{mol L}^{-1}$  streptomycin aptamer + 10  $\mu\text{mol L}^{-1}$  oxytetracycline aptamer, (f) 5  $\mu\text{mol L}^{-1}$  streptomycin aptamer + 10  $\mu\text{mol L}^{-1}$  kanamycin aptamer, (g) 5  $\mu\text{mol L}^{-1}$  streptomycin aptamer + 10  $\mu\text{mol L}^{-1}$  neomycin aptamer to measure 10  $\text{ng mL}^{-1}$  streptomycin solution. Error bars are standard deviations across three repetitive experiments.

**Table S1.** Comparison of streptomycin determinations using the proposed and reference methods

| Methods                                                   | Linear range                   | Limit of detection        | Reference |
|-----------------------------------------------------------|--------------------------------|---------------------------|-----------|
| Colorimetric and fluorescent dual-responses chemosensor   | 1.2-40.7 $\mu\text{g mL}^{-1}$ | 0.1 $\mu\text{g mL}^{-1}$ | 1         |
| Fluorescence quenching aptasensor                         | 0-1.2 $\mu\text{g mL}^{-1}$    | 27.7 $\text{ng mL}^{-1}$  | 39        |
| Electrochemical aptasensor                                | 17.4-872 $\text{ng mL}^{-1}$   | 6.6 $\text{ng mL}^{-1}$   | 3         |
| Electrochemical sensor with molecularly imprinted polymer | 0.05-20 $\text{ng mL}^{-1}$    | 10 $\text{pg mL}^{-1}$    | 40        |
| Electrochemical sensor with molecularly imprinted polymer | 0.01-10 $\text{ng mL}^{-1}$    | 7.0 $\text{pg mL}^{-1}$   | 41        |
| Electrochemical immunosensor                              | 0.05-50 $\text{ng mL}^{-1}$    | 5 $\text{pg mL}^{-1}$     | 42        |
| Electrochemical aptasensor                                | 0.05-100 $\text{ng mL}^{-1}$   | 7.8 $\text{pg mL}^{-1}$   | This work |
